# Supplementary material for: A global estimate of monthly vegetation and soil fractions from spatiotemporally adaptive spectral mixture analysis during 2001–2022
Source: Copernicus journal article supplement (doi:10.5194/essd-16-1333-2024), 2024-03-14
Supplement: Supplementary file 1 [file essd-16-1333-2024-supplement.pdf]

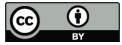

*Supplement of*

## **A global estimate of monthly vegetation and soil fractions from spatiotemporally adaptive spectral mixture analysis during 2001–2022**

**Qiangqiang Sun et al.**

*Correspondence to:* Hong Li (lih5176@126.com) and Danfeng Sun (sundf@cau.edu.cn)

The copyright of individual parts of the supplement might differ from the article licence.

---

27 **Supplementary Methods**

28 **Seasonal Mann-Kendall test**

29 The seasonal Mann-Kendall test is commonly applied to identify trends for seasonal environmental data of interest that is  
30 available as time series for which the time intervals between adjacent observations are less than one year (i.e., daily,  
31 weekly, and monthly sequences) (Hirsch et al. 1982). Letting the sequence  $X$  consist of a complete seasonal record of  $n$   
32 year that includes  $m$  seasons per year, the  $X$  can be expressed by

33 
$$X = \begin{bmatrix} x_{11} & x_{12} & \cdots & x_{1m} \\ x_{21} & x_{22} & \cdots & x_{2m} \\ \vdots & \vdots & \cdots & \vdots \\ x_{n1} & x_{n2} & \cdots & x_{nm} \end{bmatrix}$$

34 The null hypothesis,  $H_0$ , is that the  $n$  observations come from each of  $m$  seasons with independent realizations are  
35 identically distributed. While the alternative hypothesis ( $H_A$ ) of a two-sided test is that data presents a monotonic trend.

36 The Seasonal Mann-Kendall test statistic for the  $g$ th season is

37 
$$S_g = \sum_{i=1}^{n-1} \sum_{j=i+1}^n \text{sgn}(x_{jg} - x_{ig}), g = 1, 2, \dots, m$$

38 where

39 
$$\text{sgn}(\theta) = \begin{cases} 1 & \text{if } \theta > 0 \\ 0 & \text{if } \theta = 0 \\ -1 & \text{if } \theta < 0 \end{cases}$$

40  $S_g$  is asymptotically normally distributed, thus the mean of  $S_g$  is  $E[S_g] = 0$ , and the variance is

41 
$$\text{Var}[S_g] = \left\{ n(n-1)(2n+5) - \sum_{j=1}^p t_j(t_j-1)(2t_j+5) \right\} / 18$$

42 where  $n$  is the number of years of each season,  $p$  is the number of tied groups for data  $x_{ig}$ ,  $i=1,2,\dots,n$ , in season  $g$ , and  $t_j$

43 is the number of data points in the  $j$ th tied group. The seasonal Mann-Kendall test statistic is

44

$$S = \sum_{g=1}^m S_g$$

45 which is also asymptotically normally distributed where  $E[S] = 0$ , thus the variance of  $S$  is

46

$$Var[S] = \sum_{g=1}^m Var[S_g]$$

47 And the statistic  $S$  is approximately normal distributed provided that the following Z-transformation is employed,

48

$$Z = \begin{cases} \frac{S - 1}{\sqrt{Var[S]}} & \text{if } S > 0 \\ 0 & \text{if } S = 0 \\ \frac{S + 1}{\sqrt{Var[S]}} & \text{if } S < 0 \end{cases}$$

49 For a given  $\alpha$ -significance level, the original null hypothesis ( $H_0$ ) is unacceptable if  $|Z| \geq Z_{1-\alpha/2}$ . This implies a

50 significantly upward or downward trend in the series.

51 Theil-Sen estimator is a method of robust linear regression by selecting the median value of the slope of all lines passing

52 through the paired points. It is also known as Sen's slope estimation (Sen and Kumar, 1968). Here, we detect slope of

53 fractions according to seasonal Sen's method. For sequence  $X$  consisting of a complete seasonal record of  $n$  year that54 includes  $m$  seasons per year, a set of linear slopes is calculated as,

55

$$d_{g,j,k} = \frac{x_{g,j} - x_{g,k}}{j - k}$$

56 For each  $x_{i,j}, x_{i,k}$  pair  $i = 1, 2, \dots, m$ ,  $1 \leq k < j \leq n$ , where  $n$  is length of  $g$ th season. and seasonal Sen's slope is then

57 calculated as the median from all slopes.

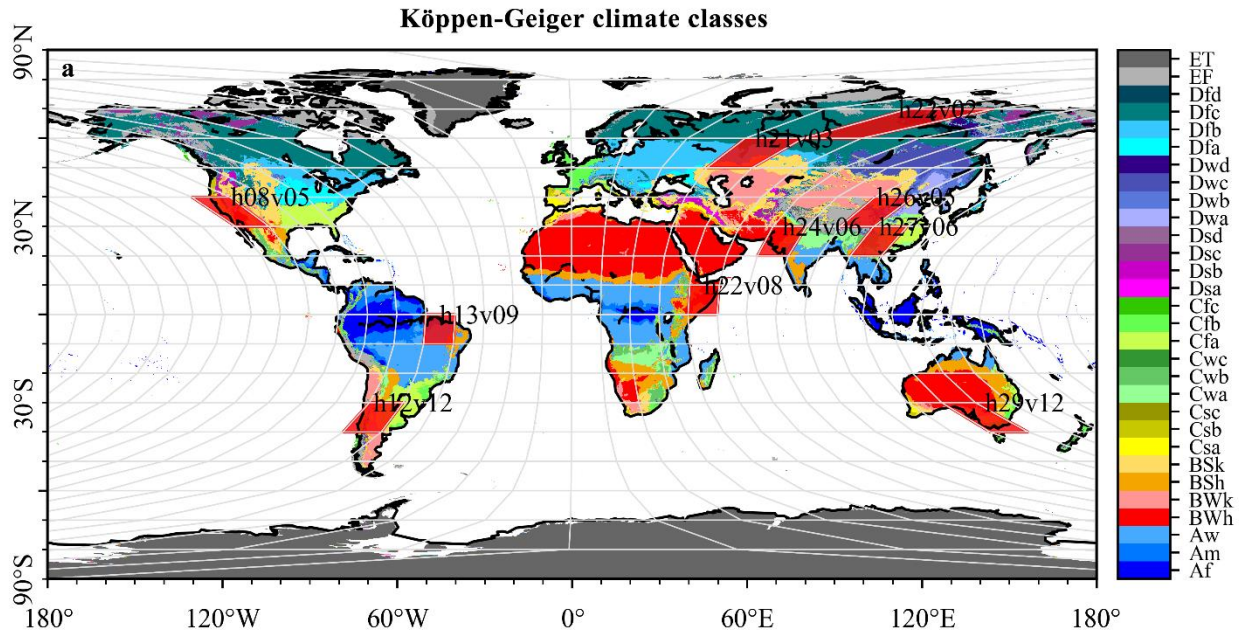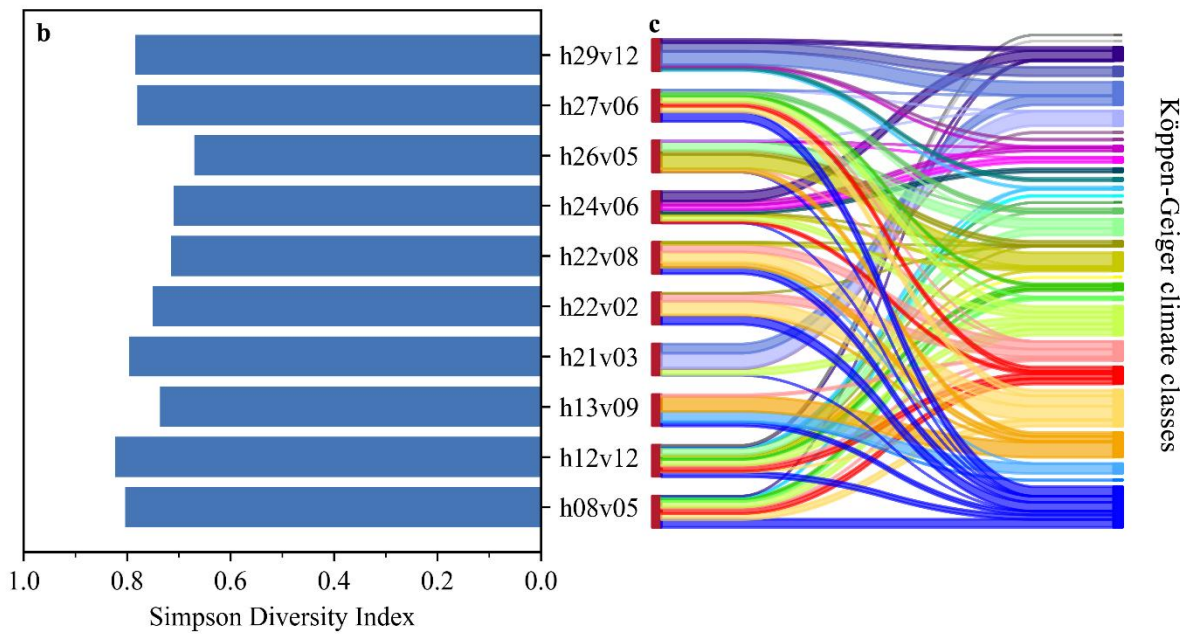

58  
 59 **Figure S1: The typical MODIS Grids for endmembers selection.** a, 10 selected MODIS grids (i.e., h08v05, h12v12, h13v09,  
 60 h16v01, h21v03, h22v02, h22v08, h24v06, h26v05, h27v06, h29v12), distributed in 6 continents, were colored with red. b, The  
 61 Simpson's Diversity Index (D) greater than 0.6 for selected MODIS grids. c, the correspondence between selected MODIS grids and  
 62 Köppen-Geiger climate classification, indicating each Köppen-Geiger climate classification was represented by selected MODIS grids.

63  
 64  
 65  
 66  
 67  
 68  
 69  
 70

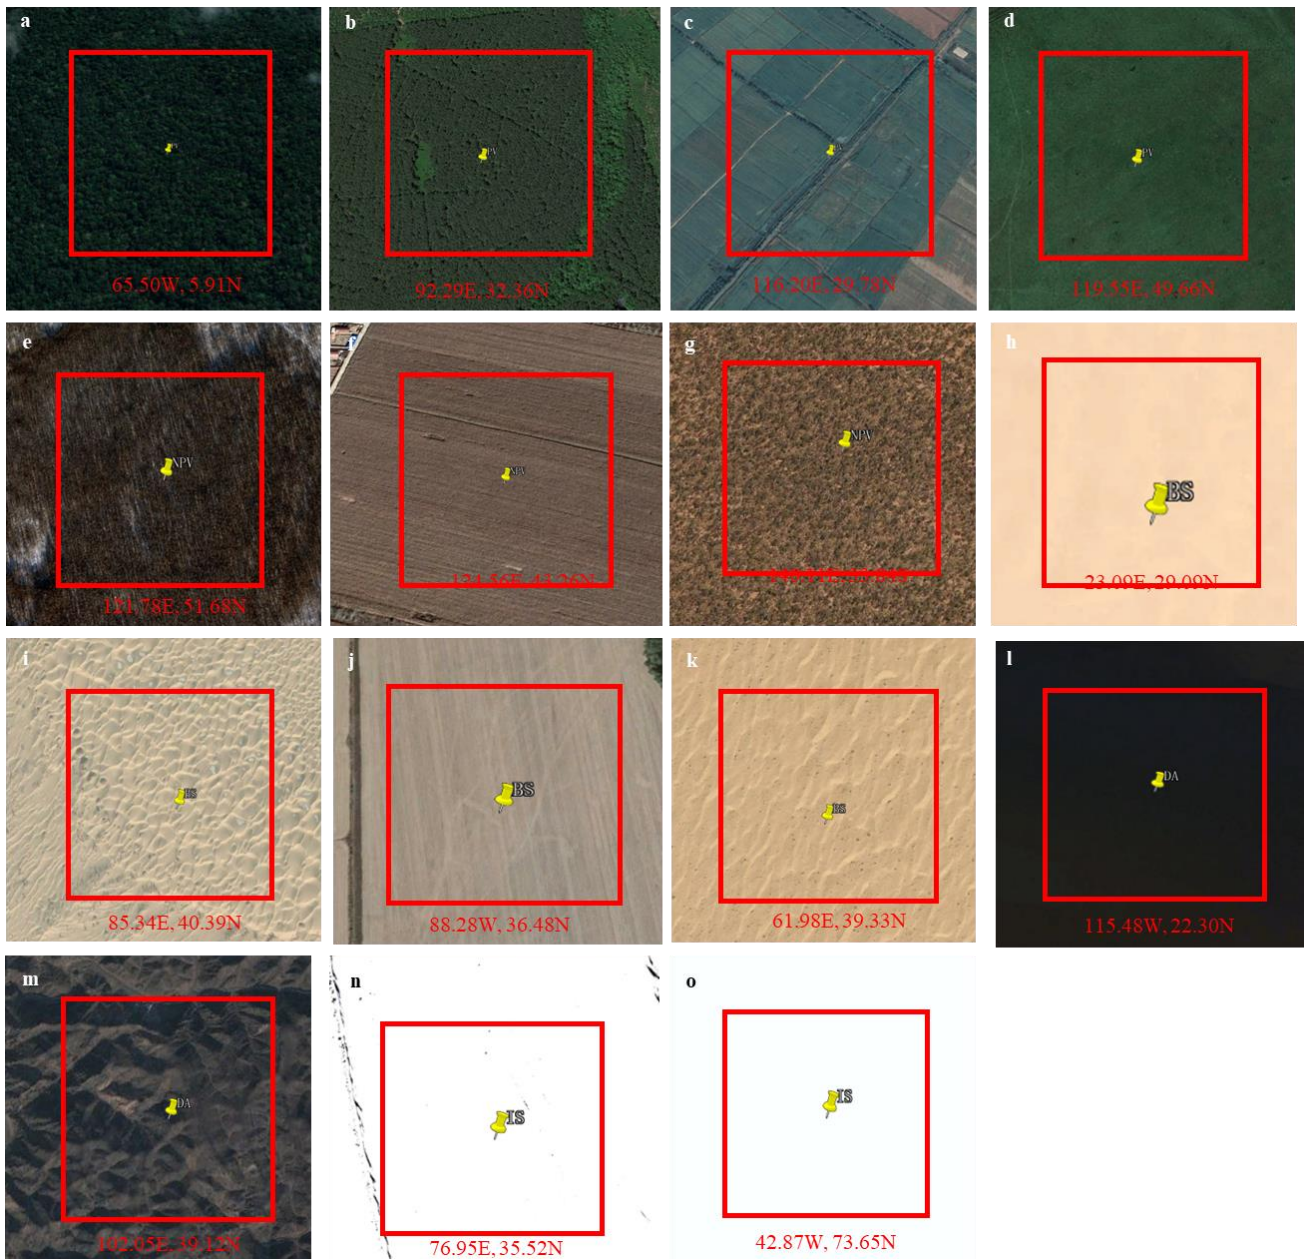

71  
72  
73  
74  
75  
76  
77

**Figure S2: Typical images representing selected pure pixel of each endmember.** a-o are tropical rainforest, temperate forest, cropland, grasslands, temperate deciduous forest in winter, crop residues, shrubs in dryland, moving sands, sand dunes, bare ground, moving sands. waters, bare rock, polar glaciers and alpine glaciers.

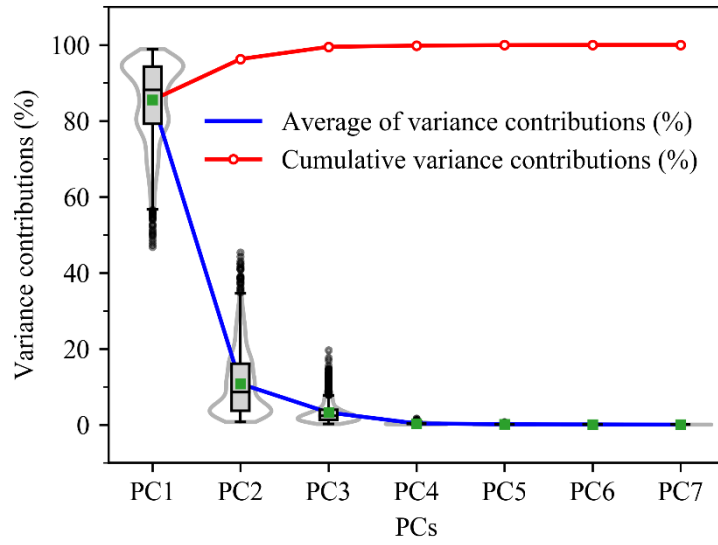

78

79

**Figure S3: Variance contributions (%) of principal component transformation for each monthly MODIS reflectance image across 10 grids (n=2280).** The violin plot and box plot revealed value distribution of each PC. The blue and red lines represented average of variance contributions and cumulative variance contributions of each PC, respectively. The cumulative contribution of the top three PCs has exceeded 99%.

81

82

83

84

85

86

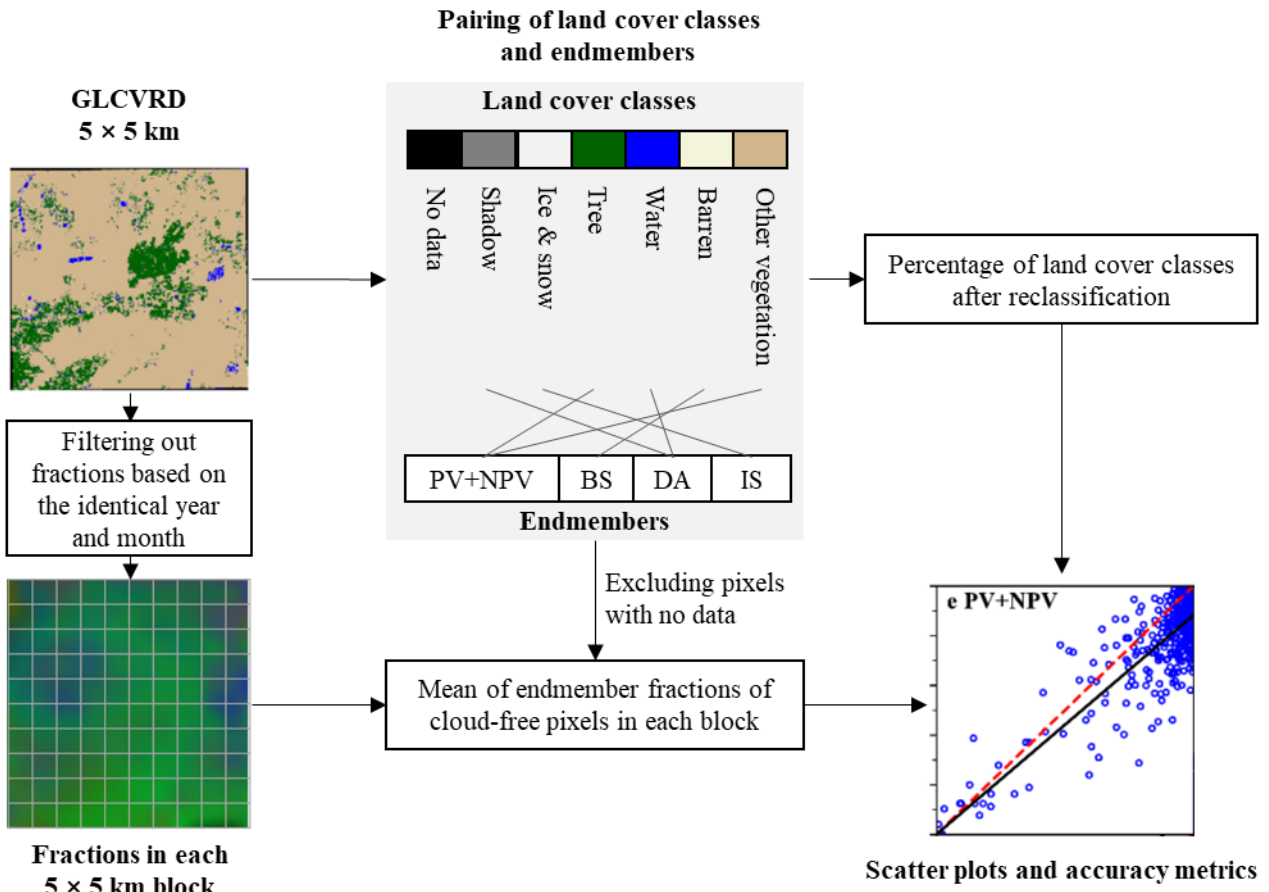

Figure S4: Procedural description for estimating fractional vegetation-soil compared to GLCVRD.

87  
88  
89  
90  
91

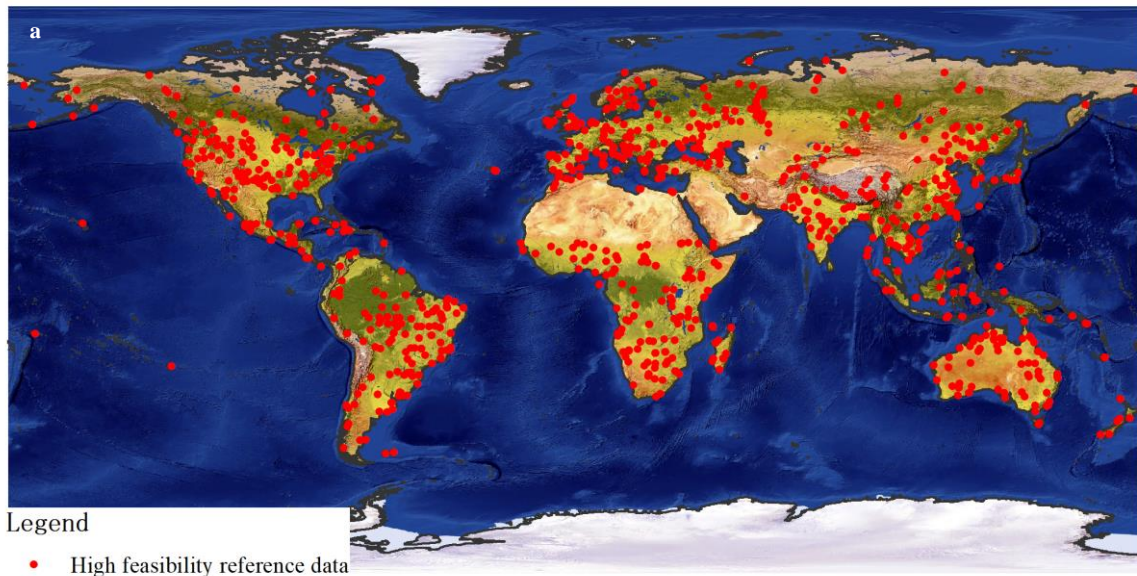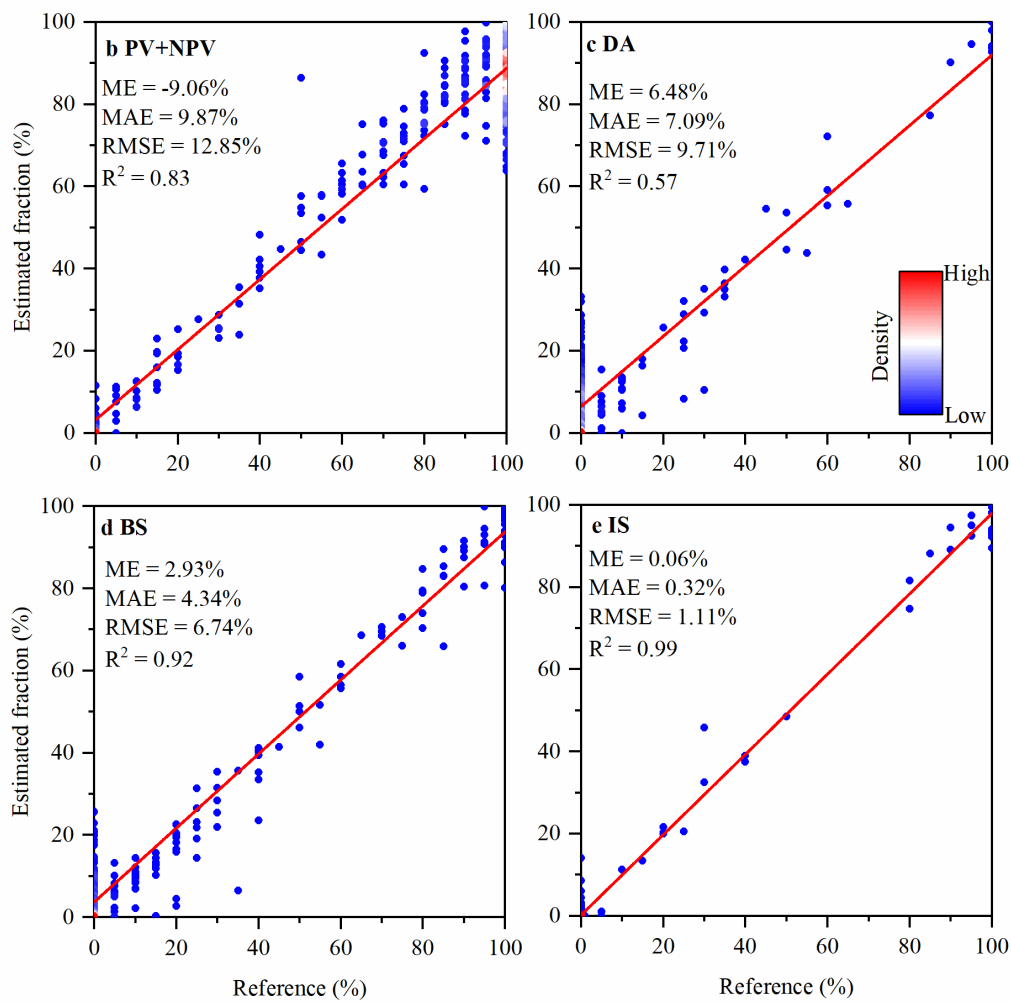

92

93 **Fig. S5 Evaluation of global fractional endmember estimates based on land cover reference data. a,** the  
 94 location of high-feasibility land cover reference data. **b-d,** Scatter plots of PV+NPV, BS, DA, IS fractions against  
 95 land cover reference data

96



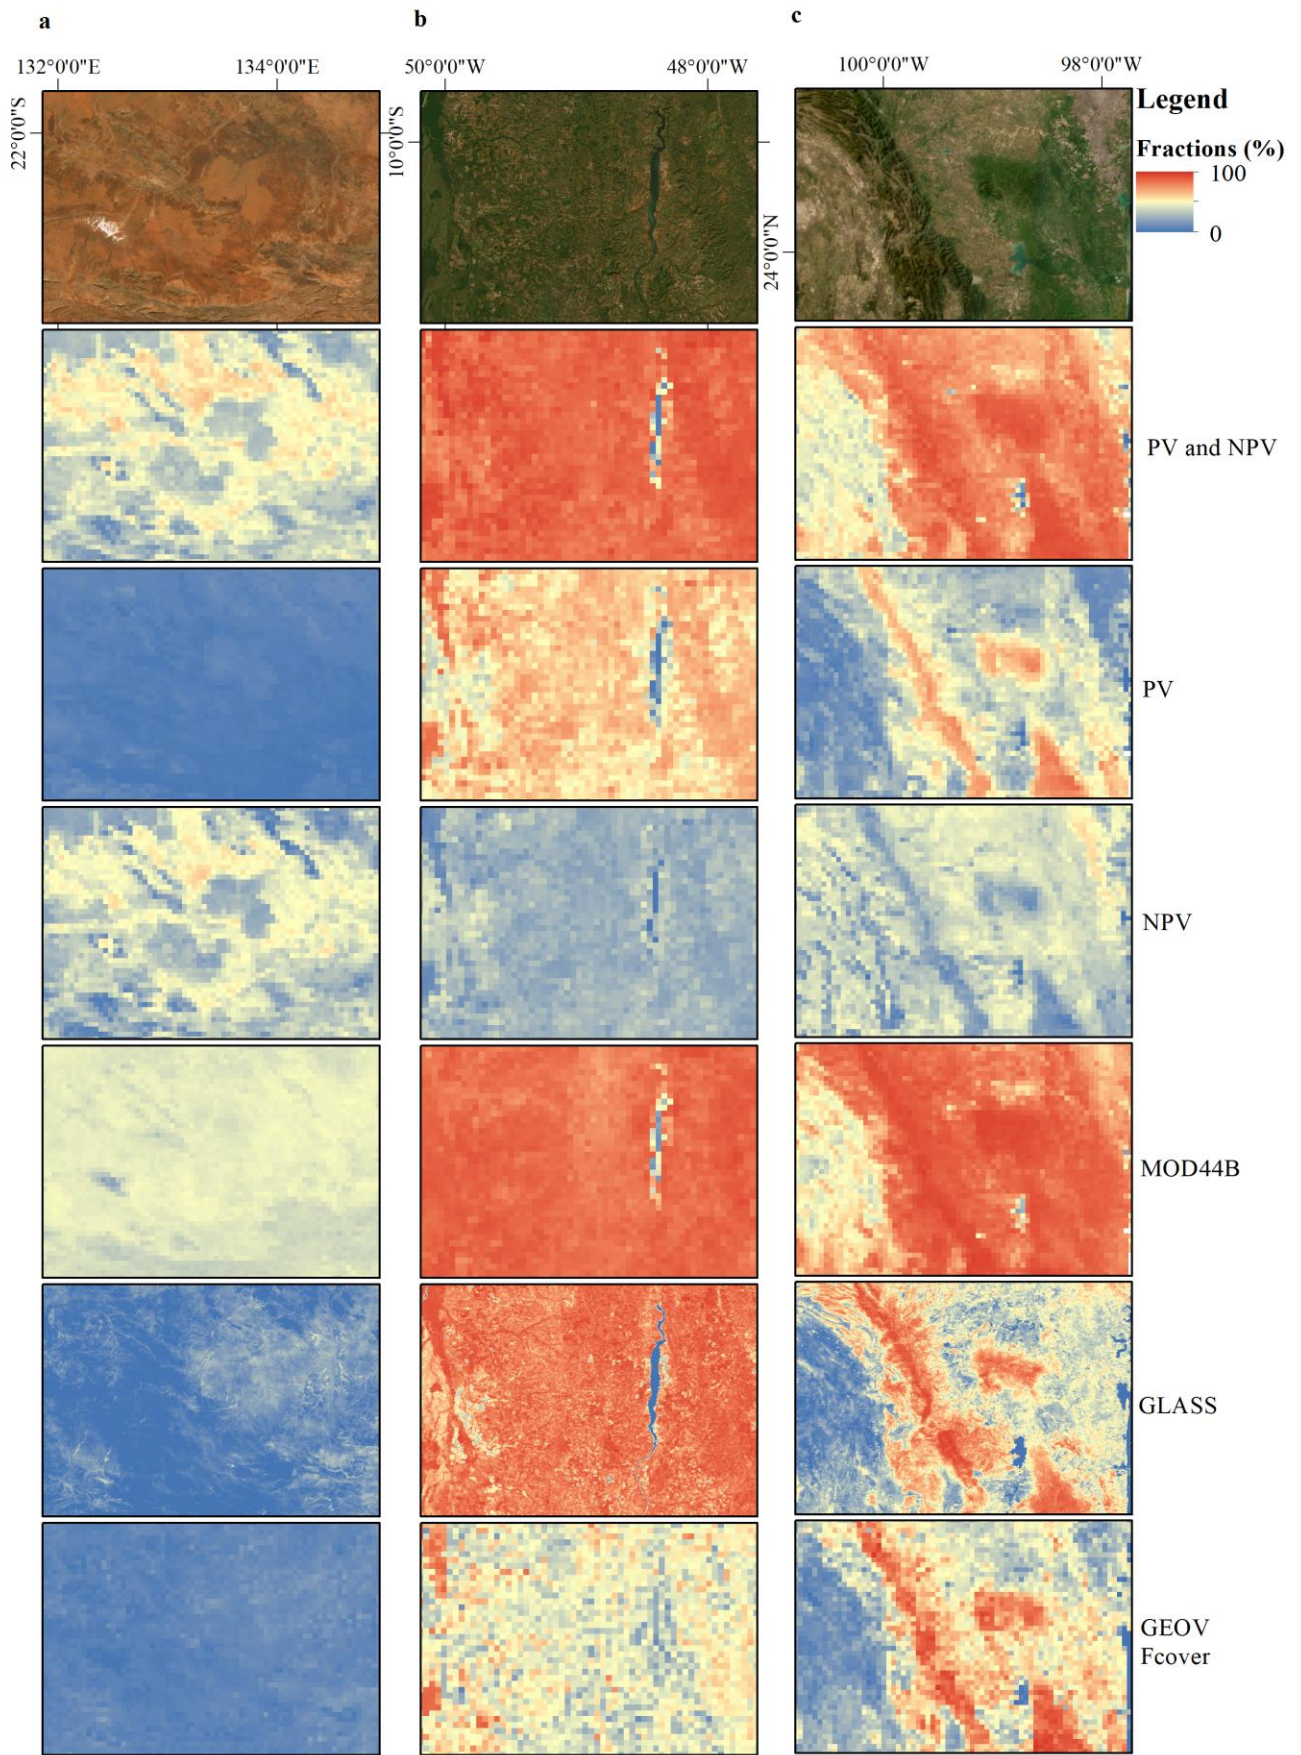

97

98 **Fig. S6** The detailed graphs for comparing different datasets. **a**, **b**, and **c** represent comparisons of vegetation

---

99 abundance products in different scenarios, specifically, regions with low vegetation cover in arid areas, high  
100 vegetation cover in tropical rainforests, and transitional zones from low to high values. The compared products  
101 include our produced PV and NPV, MOD44B, GLASS, and GEOV.

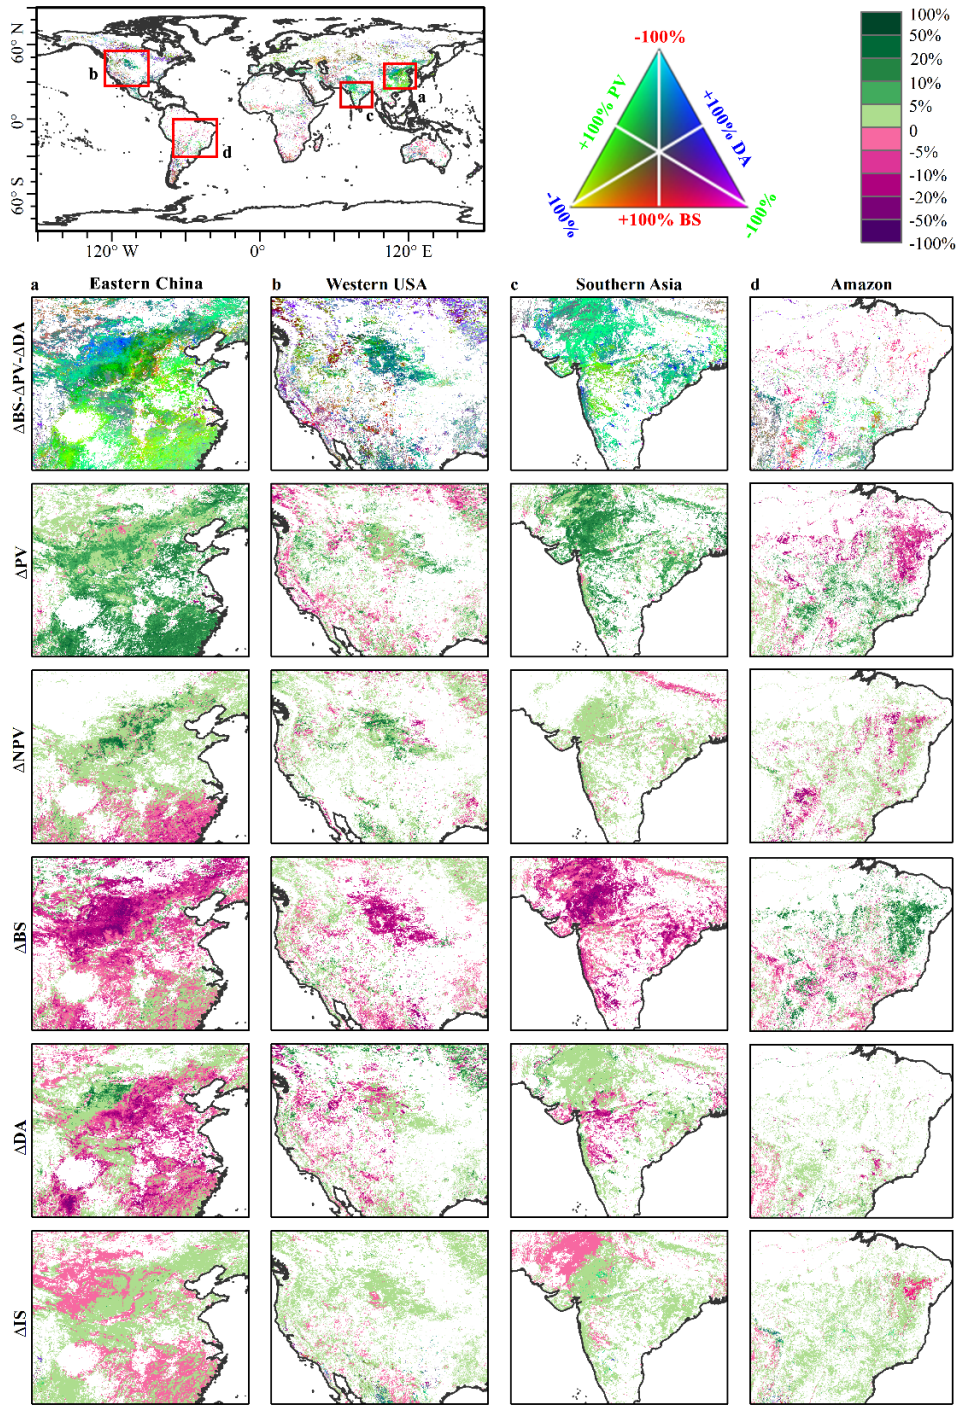

102

103 **Fig. S7 Regional detailed subsets of changes for endmember fractions.** From top to bottom, the first row represented composed  
 104 images with  $\Delta BS$ ,  $\Delta PV$ , and  $\Delta DA$ . the second to sixth row displayed the change magnitude (%) in each pixel for estimated  
 105 endmembers, i.e.,  $\Delta PV$ ,  $\Delta NPV$ ,  $\Delta BS$ ,  $\Delta DA$ , and  $\Delta IS$ . Pixels showing a statistically significant trend ( $n = 228$ , Seasonal Mann–Kendall  
 106 test,  $P < 0.05$ ) for either endmember are depicted on the change map. a-d, Eastern China, Western USA, Southern Asia, and Amazon.

**Table S1 Selected typical MODIS grids for endmember selection and corresponding timing for each endmember.**

|        | <b>Girds</b>                       | <b>Zones</b> | <b>IS</b> | <b>NPV</b> | <b>PV</b> | <b>BS</b> | <b>DA</b> |
|--------|------------------------------------|--------------|-----------|------------|-----------|-----------|-----------|
| h08v05 | West Coast of North America        |              | 2016-12   | 2005-02    | 2010-07   | 2005-02   | 2019-10   |
|        |                                    |              | 2009-12   | 2005-03    | 2012-07   | 2005-03   | 2007-10   |
|        |                                    |              | 2017-01   | 2010-03    | 2013-07   | 2010-03   | 2003-10   |
| h12v12 | West Coast of South America        |              | 2003-06   | 2007-09    | 2007-01   | 2007-09   | 2003-04   |
|        |                                    |              | 2016-05   | 2011-09    | 2016-02   | 2011-09   | 2009-04   |
|        |                                    |              | 2005-08   | 2008-09    | 2014-02   | 2008-09   | 2013-04   |
| h13v09 | Amazon Basin                       |              | -         | 2019-10    | 2016-01   | 2019-10   |           |
|        |                                    |              | -         | 2013-10    | 2018-02   | 2013-10   |           |
|        |                                    |              | -         | 2016-10    | 2004-03   | 2016-10   |           |
| h21h03 | Western Europe -Central Asia       |              | 2018-02   | 2007-10    | 2014-09   | 2017-10   |           |
|        |                                    |              | 2011-02   | 2016-10    | 2013-09   | 2016-10   |           |
|        |                                    |              | 2005-03   | 2016-10    | 2004-09   | 2009-10   |           |
| h22h02 | Russian Far East                   |              | 2003-01   |            | 2019-06   | 2019-06   | 2006-03   |
|        |                                    |              | 2009-12   |            | 2018-06   | 2018-06   | 2011-03   |
|        |                                    |              | 2010-12   |            | 2019-07   | 2019-07   | 2012-03   |
| h22h08 | East Coast of North Africa         |              | -         |            | -         | 2005-07   | 2013-04   |
|        |                                    |              | -         |            | -         | 2006-10   | 2018-05   |
|        |                                    |              | -         |            | -         | 2016-06   | 2019-10   |
| h24v06 | South Asia                         |              | -         |            | 2018-07   | 2018-07   |           |
|        |                                    |              | -         |            | 2004-07   | 2004-07   |           |
|        |                                    |              | -         |            | 2008-07   | 2008-07   |           |
| h26v05 | Northwest of Qinghai Tibet Plateau |              | 2008-01   |            | 2013-07   | 2007-03   | 2007-09   |
|        |                                    |              | 2019-02   |            | 2006-07   | 2007-11   | 2017-09   |
|        |                                    |              | 2008-02   |            | 2010-07   | 2003-11   | 2008-10   |
| h27v06 | Southwest China                    |              | -         |            | 2013-09   | 2007-11   |           |
|        |                                    |              | -         |            | 2006-08   | 2019-10   |           |
|        |                                    |              | -         |            | 2017-07   | 2004-10   |           |
| h29v12 | South Australia                    |              | -         | 2007-01    | 2019-08   | 2017-05   |           |
|        |                                    |              | -         | 2003-01    | 2016-09   | 2011-05   |           |
|        |                                    |              | -         | 2006-12    | 2016-08   | 2012-05   |           |

108

109

110

111

112

113

114

115

116

117

118

119

120

121

122

123  
124  
125

**Table S2 692 combination models.** These models include two-endmember model, three-endmember model and four-endmember model.

| Models                         | combinations      |
|--------------------------------|-------------------|
| two-endmember model<br>(88)    | PV+BS (16)        |
|                                | PV+DA (8)         |
|                                | PV+IS (8)         |
|                                | BS+DA (8)         |
|                                | BS+IS (8)         |
|                                | DA+IS (4)         |
|                                | PV+NPV (12)       |
|                                | BS+NPV(12)        |
|                                | DA+NPV(6)         |
|                                | IS+NPV(6)         |
| three-endmember model<br>(252) | PV+BS+DA (32)     |
|                                | PV+BS+IS (32)     |
|                                | PV+DA+IS (16)     |
|                                | BS+DA+IS(16)      |
|                                | PV+BS+NPV (48)    |
|                                | PV+DA+NPV (24)    |
|                                | PV+IS+NPV (24)    |
|                                | BS+DA+NPV (24)    |
|                                | BS+IS+NPV(24)     |
|                                | DA+IS+NPV (12)    |
| four-endmember model<br>(352)  | PV+BS+DA+IS (64)  |
|                                | PV+BS+DA+NPV (96) |
|                                | PV+BS+IS+NPV (96) |
|                                | PV+DA+IS+NPV(48)  |
|                                | BS+DA+IS+NPV (48) |

**Table S3 Evaluation of estimated five vegetation and soil components against GLCVRD reference dataset.**

|               | <b>ME</b> | <b>MAE</b> | <b>RMSE</b> | <b>R<sup>2</sup></b> |
|---------------|-----------|------------|-------------|----------------------|
| <b>PV+NPV</b> | -0.100    | 0.118      | 0.149       | 0.592                |
| <b>BS</b>     | 0.047     | 0.075      | 0.109       | 0.710                |
| <b>DA</b>     | 0.047     | 0.050      | 0.065       | 0.156                |
| <b>IS</b>     | 0.008     | 0.008      | 0.020       | 0.792                |

127  
128

**Table S4 Global and regional fractional endmembers dynamics.** The initial area, gain area, loss area and net change area are calculated for globe and five climate zones, i.e., tropical, arid, temperate, cold, and polar.

| Zones     | Endmembers | Initial area<br>(km <sup>2</sup> ) | Loss<br>(km <sup>2</sup> ) | Gain<br>(km <sup>2</sup> ) | Net change area<br>(km <sup>2</sup> ) |
|-----------|------------|------------------------------------|----------------------------|----------------------------|---------------------------------------|
| Globe     | PV         | 49861610.43                        | -637802.76                 | 1573227.20                 | 935424.44                             |
|           | NPV        | 15128296.27                        | -564426.41                 | 345275.53                  | -219150.87                            |
|           | BS         | 46994793.90                        | -1381062.00                | 866955.99                  | -514106.02                            |
|           | DA         | 32708319.15                        | -887176.16                 | 660346.40                  | -226829.76                            |
|           | IS         | 22247774.92                        | -114679.83                 | 139342.04                  | 24662.21                              |
| Tropical  | PV         | 16018642.05                        | -236558.32                 | 231221.99                  | -5336.33                              |
|           | NPV        | 2217754.40                         | -109780.44                 | 24544.40                   | -85236.04                             |
|           | BS         | 3830525.28                         | -197155.41                 | 319038.83                  | 121883.42                             |
|           | DA         | 2001545.61                         | -61499.28                  | 29922.32                   | -31576.96                             |
|           | IS         | 133822.65                          | -3499.33                   | 3765.24                    | 265.91                                |
| Temperate | PV         | 9393375.78                         | -78191.98                  | 413284.59                  | 335092.61                             |
|           | NPV        | 2417754.40                         | -154026.78                 | 52210.12                   | -101816.66                            |
|           | BS         | 3530525.28                         | -316382.59                 | 102279.47                  | -214103.11                            |
|           | DA         | 3001545.61                         | -79412.55                  | 62801.35                   | -16611.20                             |
|           | IS         | 133822.65                          | -9419.53                   | 6857.89                    | -2561.64                              |
| Arid      | PV         | 7302896.73                         | -166255.40                 | 431469.49                  | 265214.10                             |
|           | NPV        | 2753166.01                         | -158937.90                 | 149897.07                  | -9040.83                              |
|           | BS         | 34208215.02                        | -577137.23                 | 402055.35                  | -175081.89                            |
|           | DA         | 6055362.59                         | -301342.53                 | 226780.57                  | -74561.96                             |
|           | IS         | 3234817.92                         | -79628.12                  | 73098.70                   | -6529.42                              |
| Cold      | PV         | 15661149.01                        | -153482.53                 | 488284.80                  | 334802.27                             |
|           | NPV        | 6556417.74                         | -140497.42                 | 114025.71                  | -26471.71                             |
|           | BS         | 3772331.10                         | -278401.74                 | 38748.72                   | -239653.02                            |
|           | DA         | 17529802.86                        | -438961.80                 | 334040.19                  | -104921.61                            |
|           | IS         | 9580056.20                         | -17785.65                  | 54029.72                   | 36244.07                              |
| Polar     | PV         | 1485546.86                         | -3314.53                   | 8966.33                    | 5651.80                               |
|           | NPV        | 1183203.72                         | -1183.88                   | 4598.24                    | 3414.36                               |
|           | BS         | 1653197.22                         | -11985.03                  | 4833.61                    | -7151.42                              |
|           | DA         | 4120062.48                         | -5960.00                   | 6801.97                    | 841.96                                |
|           | IS         | 9165255.50                         | -4347.20                   | 1590.50                    | -2756.70                              |

129
